# Supplementary material for: Effects of the progressive abandonment of grazing on dung beetle biodiversity: body size matters
Source: Springer Nature journal article supplement (doi:10.1007/s10531-017-1428-3), 2017-09-08
Supplement: MOESM2 [file 15033630]

|  |  | 0D | 0D | 0D | 0D | 1D | 1D | 1D | 1D | 2D | 2D | 2D | 2D |
| --- | --- | --- | --- | --- | --- | --- | --- | --- | --- | --- | --- | --- | --- |
| Effect | df | SS | MS | F | p | SS | MS | F | p | SS | MS | F | p |
| Intercept | 1 | 11165,44 | 11165,44 | 5582,722 | 0,000000 | 308,5878 | 308,5878 | 583,4643 | 0,000000 | 126,1878 | 126,1878 | 264,114 | 0,000003 |
| Grazing intensity | 2 | 121,56 | 60,78 | 30,389 | 0,000725 | 57,4289 | 28,7144 | 54,2920 | 0,000144 | 24,5956 | 12,2978 | 25,7395 | 0,001137 |
| Error | 6 | 12,00 | 2,00 |  |  | 3,1733 | 0,5289 |  |  | 2,8667 | 0,4778 |  |  |
| Total | 8 | 133,56 |  |  |  | 60,6022 |  |  |  | 24,4622 |  |  |  |

ANOVA univariate results about alpha diversity using dung beetle abundance data

ANOVA univariate results about alpha diversity using dung beetle biomass data.

|  |  | 0D | 0D | 0D | 0D | 1D | 1D | 1D | 1D | 2D | 2D | 2D | 2D |
| --- | --- | --- | --- | --- | --- | --- | --- | --- | --- | --- | --- | --- | --- |
| Effect | df | SS | MS | F | p | SS | MS | F | p | SS | MS | F | p |
| Intercept | 1 | 11165,44 | 11165,44 | 5582,722 | 0,000000 | 486,4818 | 486,4818 | 513,1978 | 0,000000 | 257,3458 | 257,3458 | 503,2209 | 0,000001 |
| Grazing intensity | 2 | 121,56 | 60,78 | 30,389 | 0,000725 | 27,1630 | 13,5815 | 14,3274 | 0,005190 | 18,4049 | 9,2024 | 17,9947 | 0,002918 |
| Error | 6 | 12,00 | 2,00 |  |  | 5,6877 | 0,9479 |  |  | 3,0684 | 0,5114 |  |  |
| Total | 8 | 133,56 |  |  |  | 32,8507 |  |  |  | 21,4733 |  |  |  |

P values (Bonferroni correction with critical value set at 0.017) for Tukey test about alpha diversity using dung beetle biomass data: variable 0D, Error: between MS = 2.0; df = 6. Number in brackets represent the mean ± standard error of each treatment.

| Grazing intensity | Abandoned (30.667±1.2) | Low  (35.333±0.33) | Moderate  (39.667±0.67) |
| --- | --- | --- | --- |
| Abandoned (30.667±1.2) |  | *0.016* | *0.0007* |
| Low  (35.333±0.33) | *0.016* |  | *0.022* |
| Moderate  (39.667±0.67) | *0.0007* | *0.022* |  |

P values (Bonferroni correction with critical value set at 0.017) for Tukey test about alpha diversity using dung beetle biomass data: variable 1D, Error: between MS = 0.94794; df = 6. Number in brackets represent the mean ± standard error of each treatment.

| Grazing intensity | Abandoned (7.2070±0.58) | Low  (5.3007±0.62) | Moderate  (9.5487±0.47) |
| --- | --- | --- | --- |
| Abandoned (7.2070±0.58) |  | *0.116* | *0.06* |
| Low  (5.3007±0.62) | *0.116* |  | *0.004* |
| Moderate  (9.5487±0.47) | *0.06* | *0.004* |  |

P values (Bonferroni correction with critical value set at 0.017) for Tukey test about alpha diversity using dung beetle biomass data: variable 2D, Error: between MS = 0.5114; df = 6. Number in brackets represent the mean ± standard error of each treatment.

| Grazing intensity | Abandoned (5.28±0.44) | Low  (3.63±0.45) | Moderate  (7.13±0.34) |
| --- | --- | --- | --- |
| Abandoned (5.28±0.44) |  | *0.069* | *0.044* |
| Low  (3.63±0.45) | *0.069* |  | *0.002* |
| Moderate  (7.13±0.34) | *0.0044* | *0.002* |  |

P values (Bonferroni correction with critical value set at 0.017) for Tukey test about alpha diversity using dung beetle abundance data: variable 0D, Error: between MS = 2.0; df = 6. Number in brackets represent the mean ± standard error of each treatment.

| Grazing intensity | Abandoned (30.667±1.2) | Low  (35.333±0.33) | Moderate  (39.667±0.67) |
| --- | --- | --- | --- |
| Abandoned (30.667±1.2) |  | *0.016* | *0.0007* |
| Low  (35.333±0.33) | *0.016* |  | *0.022* |
| Moderate  (39.667±0.67) | *0.0007* | *0.022* |  |

P values (Bonferroni correction with critical value set at 0.017) for Tukey test about alpha diversity using dung beetle abundance data: variable 1D, Error: between MS = 0.52889; df = 6. Number in brackets represent the mean ± standard error of each treatment.

| Grazing intensity | Abandoned (7.9333±0.52) | Low  (2.3±0.15) | Moderate  (7.3333±0.48) |
| --- | --- | --- | --- |
| Abandoned (7.9333±0.52) |  | *0.0004* | *0.6* |
| Low  (2.3±0.15) | *0.0004* |  | *0.0005* |
| Moderate  (7.3333±0.48) | *0.6* | *0.0005* |  |

P values (Bonferroni correction with critical value set at 0.017) for Tukey test about alpha diversity using dung beetle abundance data: variable 2D, Error: between MS = 0.47778; df = 6. Number in brackets represent the mean ± standard error of each treatment.

| Grazing intensity | Abandoned (5.43±0.66) | Low  (1.5±0.057) | Moderate  (4.3±0.21) |
| --- | --- | --- | --- |
| Abandoned (5.43±0.66) |  | *0.001* | *0.191* |
| Low  (1.5±0.057) | *0.001* |  | *0.006* |
| Moderate  (4.3±0.21) | *0.191* | *0.006* |  |

ANOVA univariate results about dung beetle total log abundance and total log biomass.

|  |  | Log abundance | Log abundance | Log abundance | Log abundance | Log biomass | Log biomass | Log biomass | Log biomass |
| --- | --- | --- | --- | --- | --- | --- | --- | --- | --- |
| Effect | df | SS | MS | F | p | SS | MS | F | p |
| Intercept | 1 | 136,2505 | 136,2505 | 7331,388 | 0,000000 | 210,2131 | 210,2131 | 18190,45 | 0,000000 |
| Grazing intensity | 2 | 1,9844 | 0,9922 | 53,388 | 0,000151 | 0,6443 | 0,3222 | 27,88 | 0,000917 |
| Error | 6 | 0,1115 | 0,0186 |  |  | 0,0693 | 0,0116 |  |  |
| Total | 8 | 2,0959 |  |  |  | 0,7137 |  |  |  |

P values (Bonferroni correction with critical value set at 0.017) for Tukey test for dung beetle abundance: variable “log abundance”, Error: between MS = 0.01858; df = 6. Number in brackets represent the mean ± standard error of each treatment.

| Grazing intensity | Abandoned (3.4377±0.03) | Low  (4.5378±0.13) | Moderate  (3.6971±0.02) |
| --- | --- | --- | --- |
| Abandoned (3.4377±0.03) |  | *0.0004* | *0.127* |
| Low  (4.5378±0.13) | *0.0004* |  | *0.0009* |
| Moderate  (3.6971±0.02) | *0.127* | *0.0009* |  |

P values (Bonferroni correction with critical value set at 0.017) for Tukey test for dung beetle biomass: variable “log biomass”, Error: between MS = 0.0156; df = 6. Number in brackets represent the mean ± standard error of each treatment.

| Grazing intensity | Abandoned (4.5253±0.03) | Low  (5.1776±0.1) | Moderate  (4.7958±0.02) |
| --- | --- | --- | --- |
| Abandoned (4.5253±0.03) |  | *0.0009* | *0.049* |
| Low  (5.1776±0.1) | *0.0009* |  | *0.012* |
| Moderate  (4.7958±0.02) | *0.049* | *0.012* |  |

ANOVA univariate results about dung beetle body size classes.

|  |  | Small body size | Small body size | Small body size | Small body size | Medium body size | Medium body size | Medium body size | Medium body size | Large body size | Large body size | Large body size | Large body size |
| --- | --- | --- | --- | --- | --- | --- | --- | --- | --- | --- | --- | --- | --- |
| Effect | df | SS | MS | F | p | SS | MS | F | p | SS | MS | F | p |
| Intercept | 1 | 149,7971 | 149,7971 | 7567,536 | 0,000000 | 187,5601 | 187,5601 | 13029,41 | 0,000000 | 141,8760 | 141,8760 | 7278,083 | 0,000000 |
| Grazing intensity | 2 | 3,5558 | 1,7779 | 89,818 | 0,000034 | 0,5316 | 0,2658 | 18,47 | 0,002730 | 1,5218 | 0,7609 | 39,032 | 0,000364 |
| Error | 6 | 0,1188 | 0,0198 |  |  | 0,0864 | 0,0144 |  |  | 0,1170 | 0,0195 |  |  |
| Total | 8 | 3,6746 |  |  |  | 0,6180 |  |  |  | 1,6387 |  |  |  |

P values (Bonferroni correction with critical value set at 0.017) for Tukey test for dung beetle body size classes: variable “log biomass of small body size beetle”, Error: between MS = 0.01979; df = 6. Number in brackets represent the mean ± standard error of each treatment.

| Grazing intensity | Abandoned (3.2473±0.02) | Low  (4.7659±0.13) | Moderate  (4.226±0.03) |
| --- | --- | --- | --- |
| Abandoned (3.2473±0.02) |  | *0.0002* | *0.0005* |
| Low  (4.7659±0.13) | *0.0002* |  | *0.008* |
| Moderate  (4.226±0.03) | *0.0005* | *0.008* |  |

P values (Bonferroni correction with critical value set at 0.017) for Tukey test for dung beetle body size classes: variable “log biomass of medium body size beetle”, Error: between MS = 0.0144; df = 6. Number in brackets represent the mean ± standard error of each treatment.

| Grazing intensity | Abandoned (4.4961±0.04) | Low  (4.8912±0.09) | Moderate  (4.308±0.05) |
| --- | --- | --- | --- |
| Abandoned (4.4961±0.04) |  | *0.016* | *0.213* |
| Low  (4.8912±0.09) | *0.016* |  | *0.003* |
| Moderate  (4.308±0.05) | *0.213* | *0.003* |  |

P values (Bonferroni correction with critical value set at 0.017) for Tukey test for dung beetle body size classes: variable “log biomass of large body size beetle”, Error: between MS = 0.01949; df = 6. Number in brackets represent the mean ± standard error of each treatment.

| Grazing intensity | Abandoned (3.4104±0.11) | Low  (4.1145±0.01) | Moderate  (4.3862±0.07) |
| --- | --- | --- | --- |
| Abandoned (3.4104±0.11) |  | *0.002* | *0.0005* |
| Low  (4.1145±0.007) | *0.002* |  | *0.119* |
| Moderate  (4.3862±0.07) | *0.0005* | *0.119* |  |
